# Supplementary material for: Synthesis of a functionalized carbon supported platinum–iridium nanoparticle catalyst by the rapid chemical reduction method for the anodic reaction of direct methanol fuel cells
Source: Royal Society of Chemistry journal article supplement (doi:10.1039/d2nj03209k), 2022-01-01
Supplement: d2nj03209k1.pdf [file d2nj03209k1.pdf]

## SUPPORTING INFORMATION

### Synthesis of Functionalized Carbon Supported Platinum –Iridium Nanoparticles Catalyst by Rapid Chemical Reduction Method for Anodic Reaction of Direct Methanol Fuel Cell

Muhammed Bekmezci<sup>1,2</sup>, Deniz Belkıs Subasi<sup>1,2</sup>, Ramazan Bayat<sup>1,2</sup>, Merve Akin<sup>1,2</sup>,  
Zeynep Kazel Coguplugil<sup>1</sup>, Fatih Sen<sup>1\*</sup>

<sup>1</sup> Sen Research Group, Department of Biochemistry, Dumlupınar University, Kutahya, Turkey

<sup>2</sup> Department of Materials Science & Engineering, Faculty of Engineering, Dumlupınar University, Kutahya, Turkey

#### FIGURES:

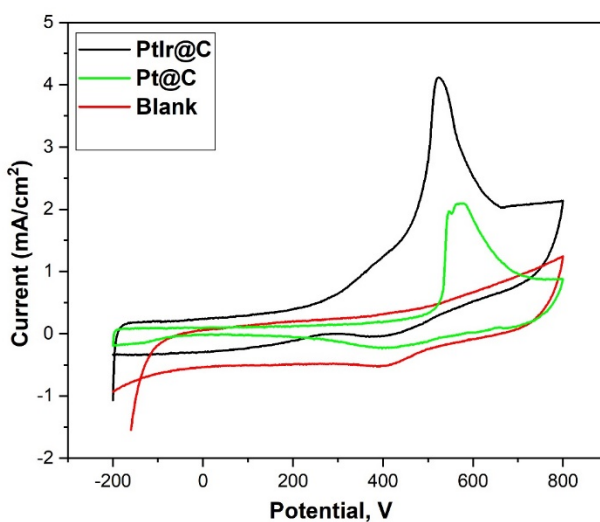

**Figure S1.** CO Stripping Voltammogram of PtIr@C and Pt@C Catalysts in 0.5 M H<sub>2</sub>SO<sub>4</sub> at 25 mV s<sup>-1</sup>

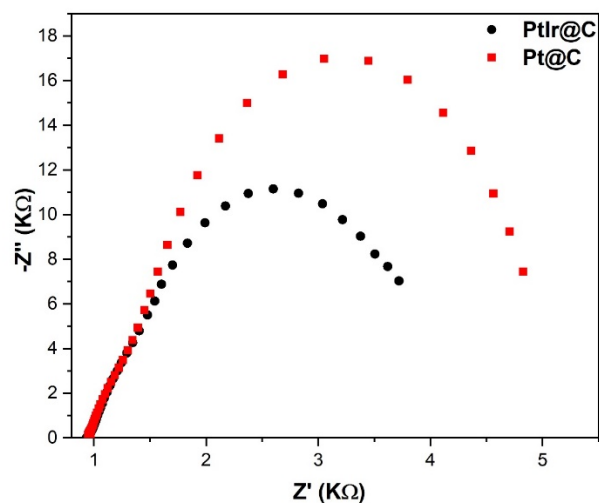

**Figure S2.** Nyquist Plot of PtIr@C and Pt@C in 1 M KOH Containing 1 M CH<sub>3</sub>OH, Frequency Ranging from 10 kHz to 0.01 Hz

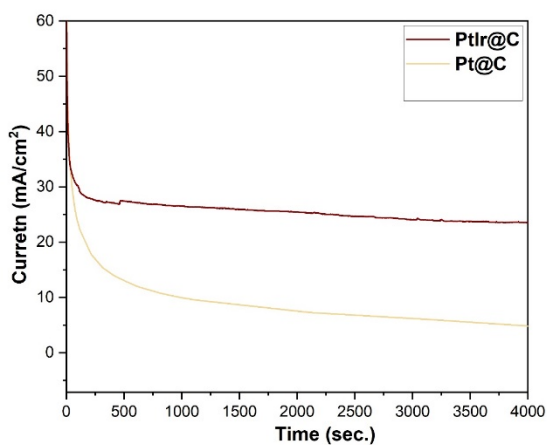

**Figure S3.** Chronoamperometry graph of PtIr@C and Pt@C during 4000 s.

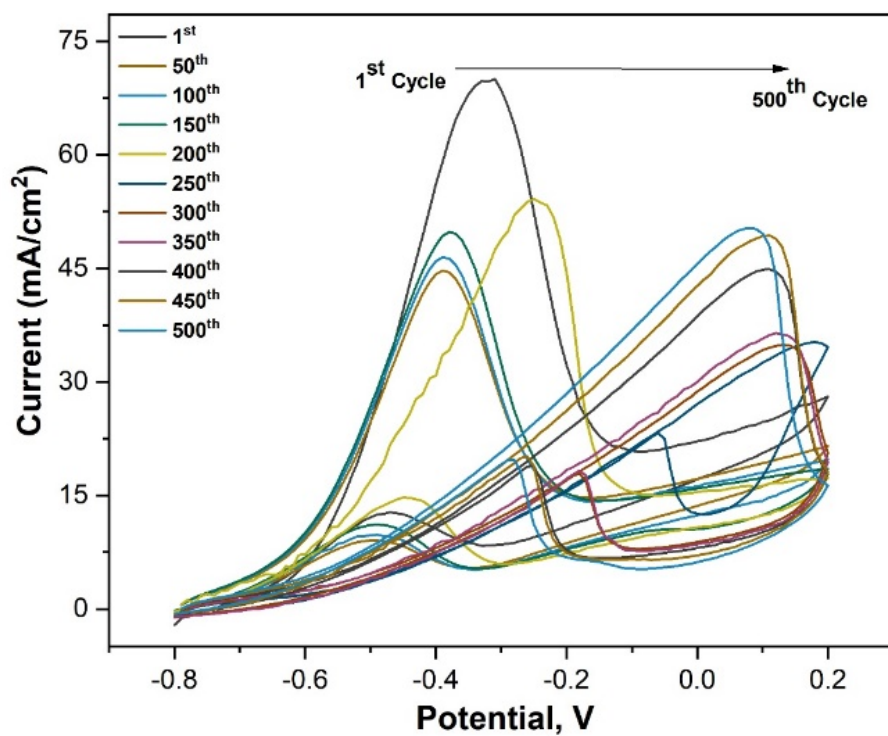

**Figure S4.** Multiple cycle durability test for PtIr@C and Pt@C in 1 M KOH containing 0.7 M CH<sub>3</sub>OH
